# Supplementary material for: Facile synthesis of hierarchical β-LiFePO4and its phase transformation to electrochemically active α-LiFePO4for Li-ion batteries
Source: Royal Society of Chemistry journal article supplement (doi:10.1039/c6ce01294a), 2016-01-01
Supplement: c6ce01294a1.pdf [file c6ce01294a1.pdf]

## Supporting Information

### Facile synthesis of hierarchical $\beta$ -LiFePO<sub>4</sub> and its phase transformation to electrochemically active $\alpha$ -LiFePO<sub>4</sub> for li-ion battery

Chunyang Wu<sup>\*a</sup>, Wei Huang<sup>a</sup>, Lifeng Liu<sup>b</sup>, Hao Wang<sup>a</sup>, Yuewu Zeng<sup>a</sup>, Jian Xie<sup>a</sup>, Chuanhong

Jin<sup>\*a</sup> and Ze Zhang<sup>a</sup>

#### This file includes:

Fig. S1–S3

---

<sup>a</sup> State Key Laboratory of Silicon Materials, Key Laboratory of Advanced Materials and Applications for Batteries of Zhejiang Province, School of Materials Science and Engineering, Zhejiang University, Hangzhou 310027, China.  
E-mail: wucy@zju.edu.cn (C.W.), chhjin@zju.edu.cn (C.J.); Fax: +86-571-87953700; Tel: +86-571-87953700

<sup>b</sup>International Iberian Nanotechnology Laboratory (INL), Av. Mestre Jose Veiga, 4715-330 Braga, Portugal.

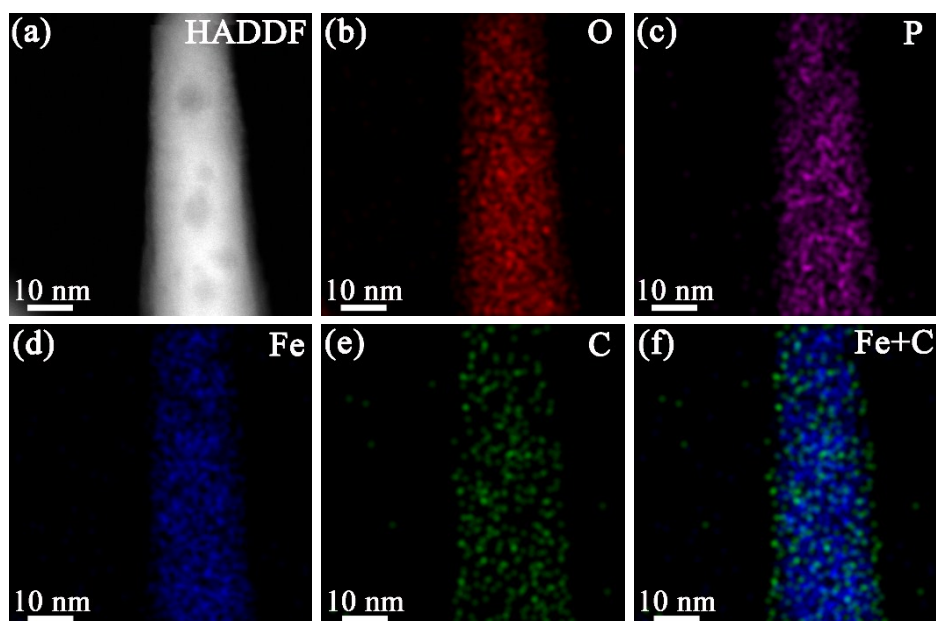

**Fig. S1** (a) HAADF-STEM image and (b–f) EDX mapping of  $\beta$ -LiFePO<sub>4</sub>

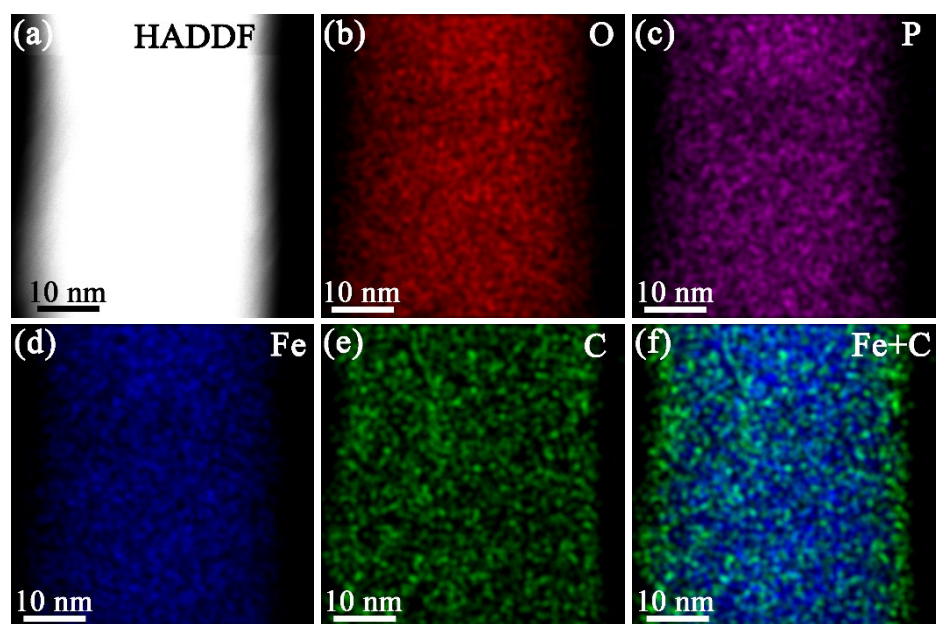

**Fig. S2** (a) HAADF-STEM image and (b–f) EDX mapping of  $\alpha$ -LiFePO<sub>4</sub>

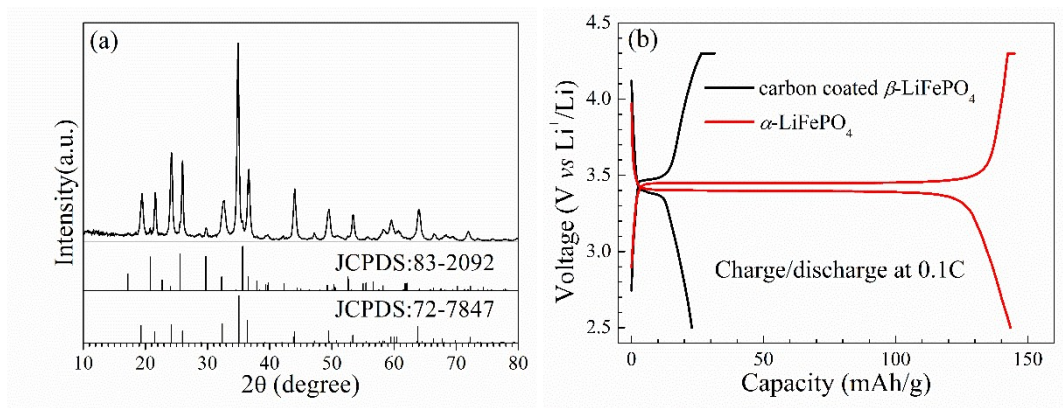

**Fig. S3** (a) XRD pattern and (b) charge/discharge curves of carbon coated  $\beta\text{-LiFePO}_4$  and  $\alpha\text{-LiFePO}_4$  at 0.1 C
